# Supplementary material for: Nighttime dissolution in a temperate coastal ocean ecosystem increases under acidification
Source: PubMed Central journal article supplement (PMC4796880; doi:10.1038/srep22984), 2016-03-18
Supplement: srep22984-s1.pdf [file srep22984-s1.pdf]

# Nighttime dissolution in a temperate coastal ocean ecosystem increases under acidification: Supplementary material

Lester Kwiatkowski<sup>1\*</sup>, Brian Gaylord<sup>2</sup>, Tessa Hill<sup>2</sup>, Jessica Hosfelt<sup>2</sup>, Kristy J. Kroeker<sup>2,3</sup>, Yana Nebuchina<sup>1</sup>, Aaron Ninokawa<sup>2</sup>, Ann Russell<sup>2</sup>, Emily B. Rivest<sup>2</sup>, Marine Sesboüé<sup>1</sup>, Ken Caldeira<sup>1</sup>

<sup>1</sup> Department of Global Ecology, Carnegie Institution for Science, 260 Panama Street, Stanford, California, 94305, USA;

<sup>2</sup> Bodega Marine Laboratory, University of California, Bodega Bay, California, 94923, USA;

<sup>3</sup> Center for Ocean Health, 100 Shaffer Road, University of California, Santa Cruz, California, 95064, USA.

## Abbreviations

|                 |                                     |
|-----------------|-------------------------------------|
| $A_T$           | Total alkalinity                    |
| $C_T$           | Dissolved Inorganic Carbon          |
| $G_{net}$       | Net community calcification         |
| $P_{net}$       | Net community production            |
| $\Omega_{arag}$ | Aragonite saturation state          |
| PAR             | Photosynthetically active radiation |
| $PAR_{mm}$      | Michaelis-Menten function of PAR    |
| $T_f$           | Gaussian function of temperature    |
| $F_{CO_2}$      | Air-sea flux of $CO_2$              |
| $\rho$          | Sea water density                   |
| $d$             | Mean tide pool depth                |

## Collinearity between explanatory variables

Table S1. Variance Inflation factors (VIFs) for the potential explanatory variables in each tide pool during the day.

|               | $PAR_{mm}$ | $P_{net}$ | $T_f$ | $\Omega_{arag}$ |
|---------------|------------|-----------|-------|-----------------|
| <b>Pool 1</b> | 5.48       | 2.00      | 4.32  | 1.28            |
| <b>Pool 2</b> | 2.49       | 1.22      | 1.64  | 2.15            |
| <b>Pool 3</b> | 6.45       | 2.25      | 5.04  | 4.00            |
| <b>Pool 4</b> | 3.07       | 2.69      | 2.11  | 2.26            |

Table S2. Variance Inflation factors (VIFs) for the potential explanatory variables in each tide pool during the night.

|               | $P_{net}$ | $T_f$ | $\Omega_{arag}$ |
|---------------|-----------|-------|-----------------|
| <b>Pool 1</b> | 1.55      | 1.52  | 2.15            |
| <b>Pool 2</b> | 2.12      | 1.21  | 2.34            |
| <b>Pool 3</b> | 1.97      | 1.72  | 2.53            |
| <b>Pool 4</b> | 1.58      | 1.61  | 2.03            |

Table S3. Pearson correlation coefficients between explanatory variables in each tide pool during the day.

|               |                         | <b>PAR<sub>mm</sub></b> | <b>P<sub>net</sub></b> | <b>T<sub>f</sub></b> | <b>Ω<sub>arag</sub></b> |
|---------------|-------------------------|-------------------------|------------------------|----------------------|-------------------------|
| <b>Pool 1</b> | <b>PAR<sub>mm</sub></b> | 1                       |                        |                      |                         |
|               | <b>P<sub>net</sub></b>  | 0.70                    | 1                      |                      |                         |
|               | <b>T<sub>f</sub></b>    | 0.87                    | 0.58                   | 1                    |                         |
|               | <b>Ω<sub>arag</sub></b> | 0.43                    | 0.29                   | 0.46                 | 1                       |
| <b>Pool 2</b> | <b>PAR<sub>mm</sub></b> | 1                       |                        |                      |                         |
|               | <b>P<sub>net</sub></b>  | -0.09                   | 1                      |                      |                         |
|               | <b>T<sub>f</sub></b>    | 0.58                    | 0.18                   | 1                    |                         |
|               | <b>Ω<sub>arag</sub></b> | 0.70                    | -0.29                  | 0.37                 | 1                       |
| <b>Pool 3</b> | <b>PAR<sub>mm</sub></b> | 1                       |                        |                      |                         |
|               | <b>P<sub>net</sub></b>  | 0.40                    | 1                      |                      |                         |
|               | <b>T<sub>f</sub></b>    | 0.88                    | 0.33                   | 1                    |                         |
|               | <b>Ω<sub>arag</sub></b> | 0.71                    | -0.15                  | 0.71                 | 1                       |
| <b>Pool 4</b> | <b>PAR<sub>mm</sub></b> | 1                       |                        |                      |                         |
|               | <b>P<sub>net</sub></b>  | 0.53                    | 1                      |                      |                         |
|               | <b>T<sub>f</sub></b>    | 0.37                    | 0.71                   | 1                    |                         |
|               | <b>Ω<sub>arag</sub></b> | 0.61                    | -0.03                  | -0.12                | 1                       |

Table S4. Pearson correlation coefficients between explanatory variables in each tide pool during the night.

|               |                         | <b>P<sub>net</sub></b> | <b>T<sub>f</sub></b> | <b>Ω<sub>arag</sub></b> |
|---------------|-------------------------|------------------------|----------------------|-------------------------|
| <b>Pool 1</b> | <b>P<sub>net</sub></b>  | 1                      |                      |                         |
|               | <b>T<sub>f</sub></b>    | -0.09                  | 1                    |                         |
|               | <b>Ω<sub>arag</sub></b> | -0.55                  | 0.53                 | 1                       |
| <b>Pool 2</b> | <b>P<sub>net</sub></b>  | 1                      |                      |                         |
|               | <b>T<sub>f</sub></b>    | -0.02                  | 1                    |                         |
|               | <b>Ω<sub>arag</sub></b> | -0.70                  | 0.31                 | 1                       |
| <b>Pool 3</b> | <b>P<sub>net</sub></b>  | 1                      |                      |                         |
|               | <b>T<sub>f</sub></b>    | 0.09                   | 1                    |                         |
|               | <b>Ω<sub>arag</sub></b> | -0.57                  | 0.48                 | 1                       |
| <b>Pool 4</b> | <b>P<sub>net</sub></b>  | 1                      |                      |                         |
|               | <b>T<sub>f</sub></b>    | 0.12                   | 1                    |                         |
|               | <b>Ω<sub>arag</sub></b> | -0.46                  | 0.48                 | 1                       |

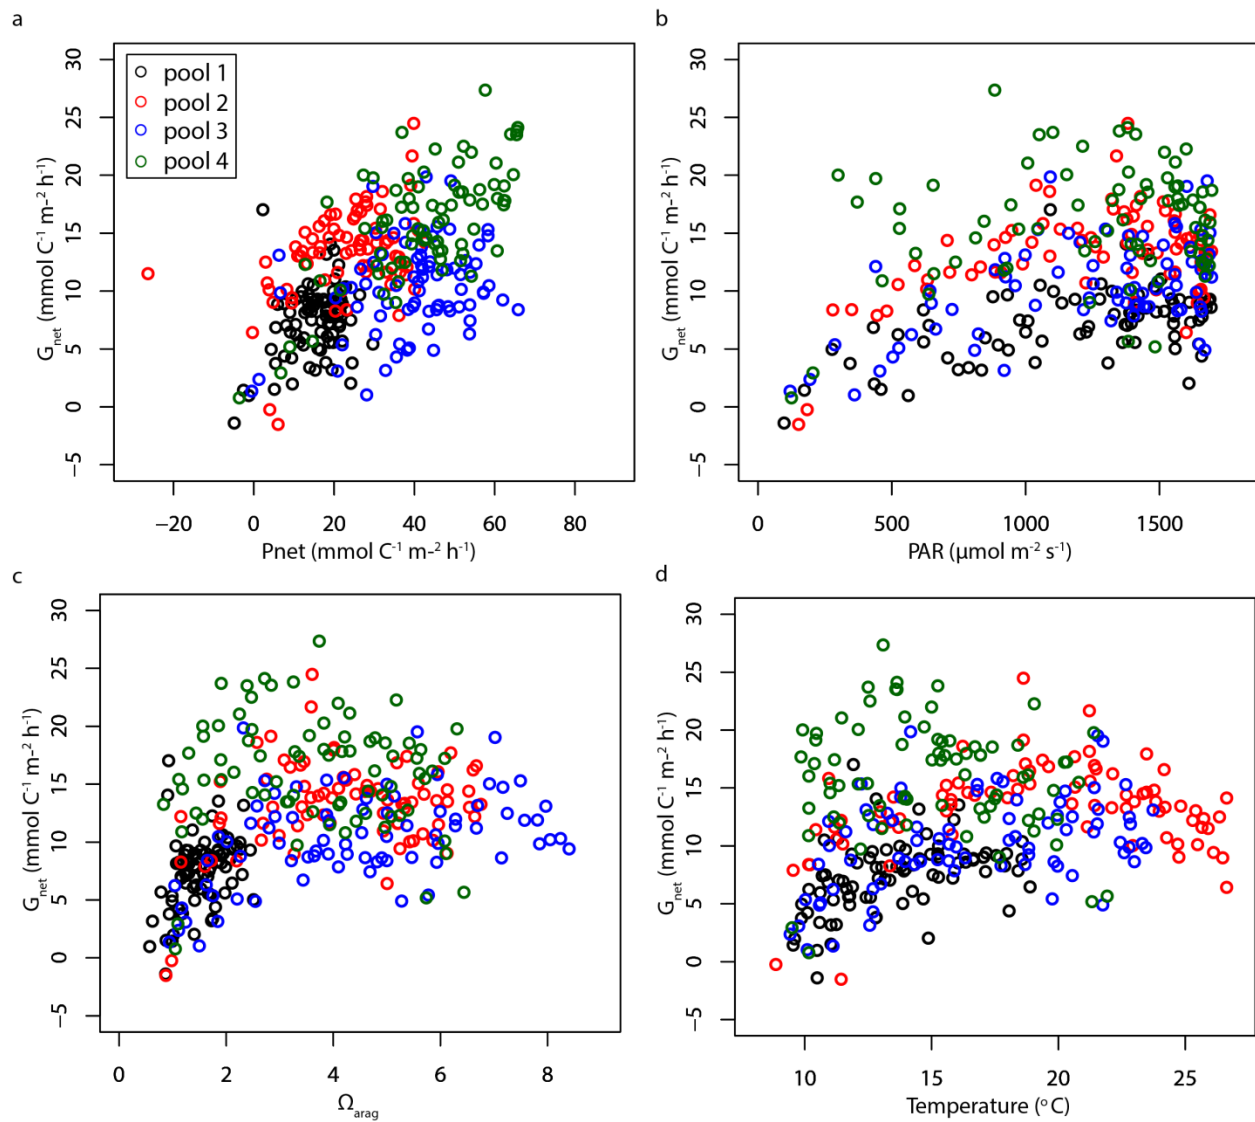

Figure S1.  $G_{\text{net}}$  ( $\text{mmol C}^{-1} \text{m}^{-2} \text{h}^{-1}$ ) against a,  $P_{\text{net}}$  ( $\text{mmol C}^{-1} \text{m}^{-2} \text{h}^{-1}$ ), b, Photosynthetically Active Radiation ( $\mu\text{mol m}^{-2} \text{s}^{-1}$ ), c, Aragonite saturation state ( $\Omega_{\text{arag}}$ ) and d, Temperature ( $^{\circ}\text{C}$ ) in each of the tide pools during the day.

## Nutrients

The concentration of  $\text{NO}_2^- + \text{NO}_3^-$  is found to generally decrease between the first and last bottle samples on a given sample day (daylight hours; Fig. S2). Although this may be representative of net community nutrient  $\text{NO}_2^- + \text{NO}_3^-$  uptake, the magnitude of changes are orders of magnitude lower than changes in  $\Delta A_7$  and therefore any corresponding net community release of anions<sup>1,2,3</sup> would have negligible influence on  $G_{\text{net}}$ . The rate of change of  $\text{NH}_3 + \text{NH}_4^+$  concentration between first and last daily bottle samples is shown to be highly variable (Fig. S2). However measured  $\Delta(\text{NH}_3 + \text{NH}_4^+)$  explains none of the variance in  $\Delta A_7$  (Fig. S3). As such, sporadic high concentrations are interpreted as a consequence of local animal excretion and not a result of net community uptake. The release of  $\text{H}^+$  associated with the latter would have had a strong influence on measured  $A_7$ <sup>1,2,3</sup>. We therefore conclude that  $\Delta A_7$  is primarily driven by community calcification. Nutrient concentrations were not measured for nighttime samples.

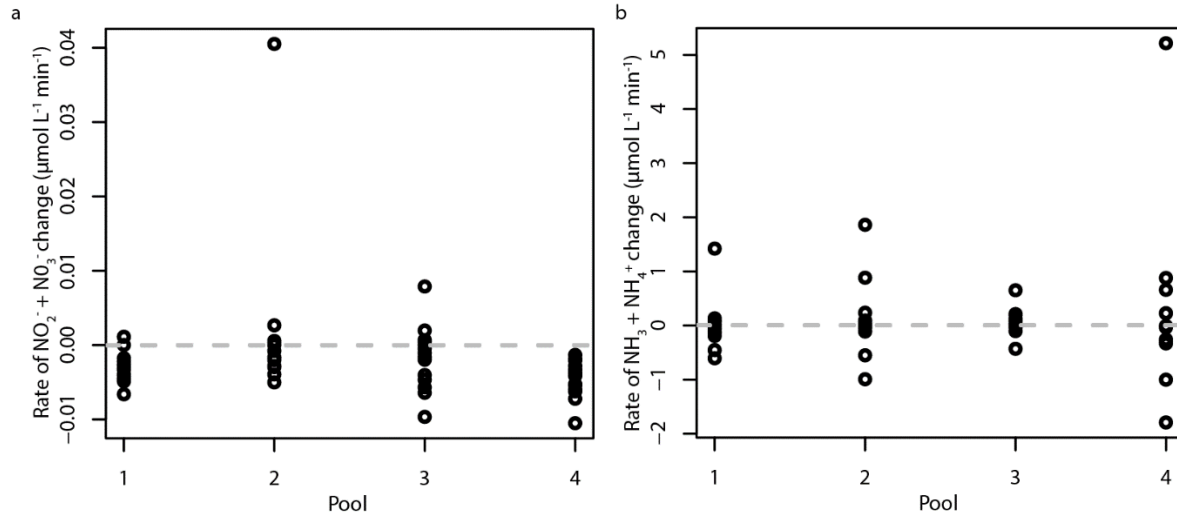

Figure S2. Rate of a,  $\text{NO}_2^- + \text{NO}_3^-$  and b,  $\text{NH}_3 + \text{NH}_4^+$  concentration change between first and last daily sampling times in each tide pool ( $\mu\text{mol L}^{-1} \text{min}^{-1}$ ). All samples were taken during the daytime.

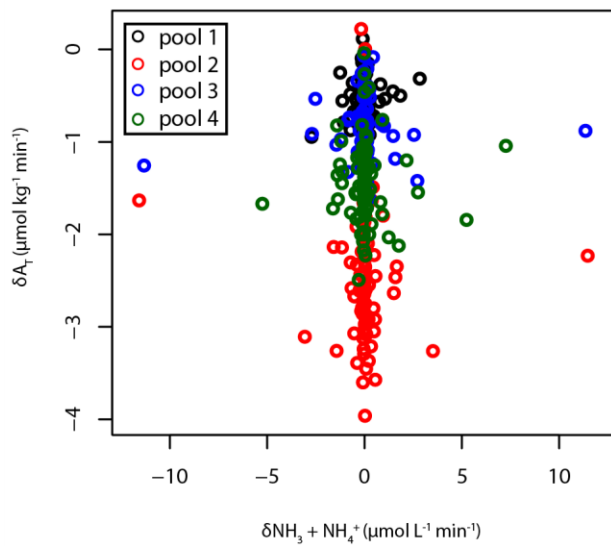

Figure S3.  $\delta\text{NH}_3 + \text{NH}_4^+$  ( $\mu\text{mol L}^{-1} \text{min}^{-1}$ ) against  $\delta A_T$  ( $\mu\text{mol kg}^{-1} \text{min}^{-1}$ ) in each tide pool. There is no significant relationship between  $\delta\text{NH}_3 + \text{NH}_4^+$  and  $\delta A_T$  in any of the tide pools.

## PAR and temperature functions

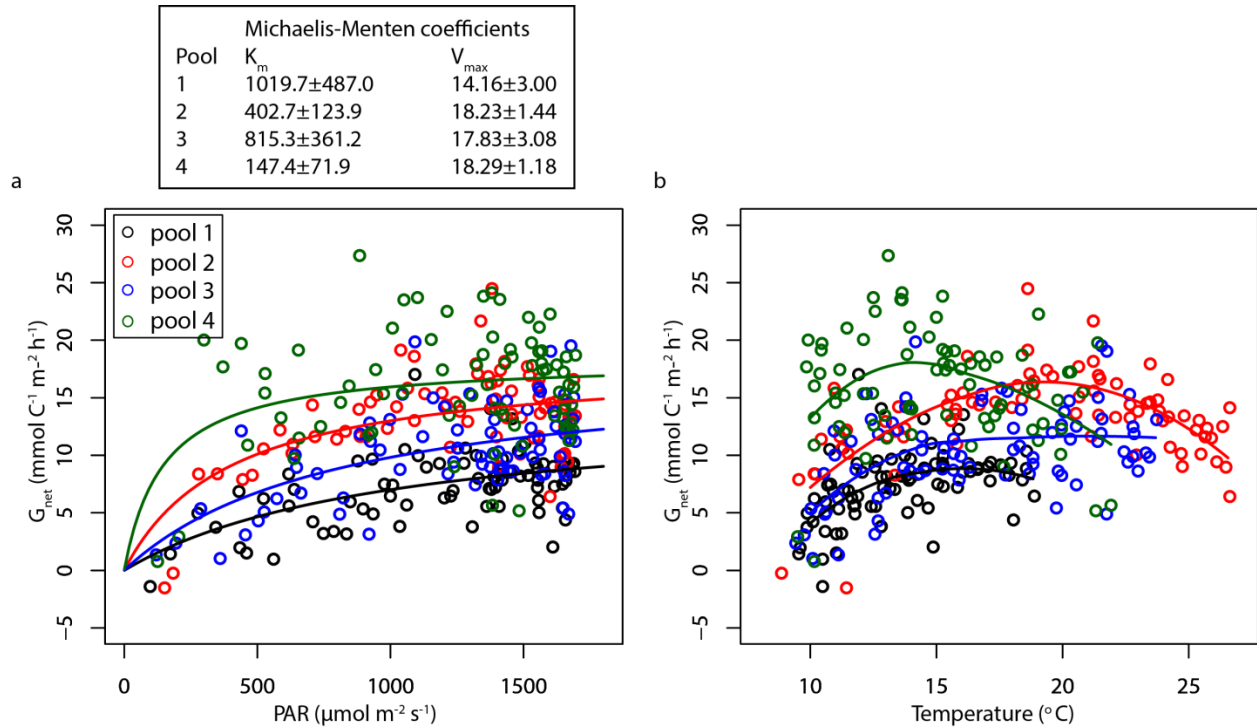

Figure S4.  $G_{net}$  ( $\text{mmol C}^{-1} \text{m}^{-2} \text{h}^{-1}$ ) against a, PAR ( $\mu\text{mol m}^{-2} \text{s}^{-1}$ ) and b, temperature ( $^{\circ}\text{C}$ ) in each of the tide pools. Michaelis-Menten and Gaussian functions are derived for  $G_{net}$ -PAR and  $G_{net}$ -temperature relationships respectively. Michaelis-Menten ( $V = V_{max}[S]/(K_m + [S])$ ) coefficients with associated standard errors are given however as the Gaussian temperature functions are produced using locally weighted regression methods (LOESS)<sup>4</sup> they cannot be represented by a simple mathematical equation.

## Alkalinity-dissolved inorganic carbon relationships

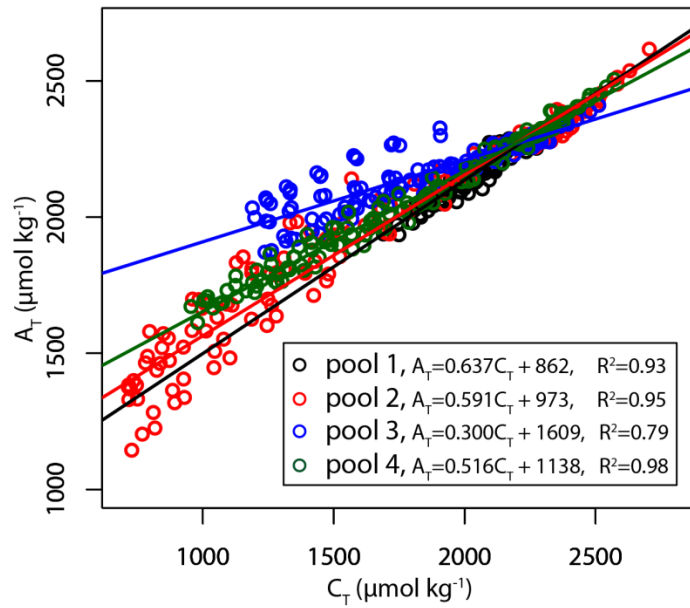

Figure S5. Total least squares regressions between alkalinity ( $A_T$ ) and dissolved inorganic carbon ( $C_T$ ) in each of the tide pools.



## Nighttime community calcification against $P_{\text{net}}$ and temperature

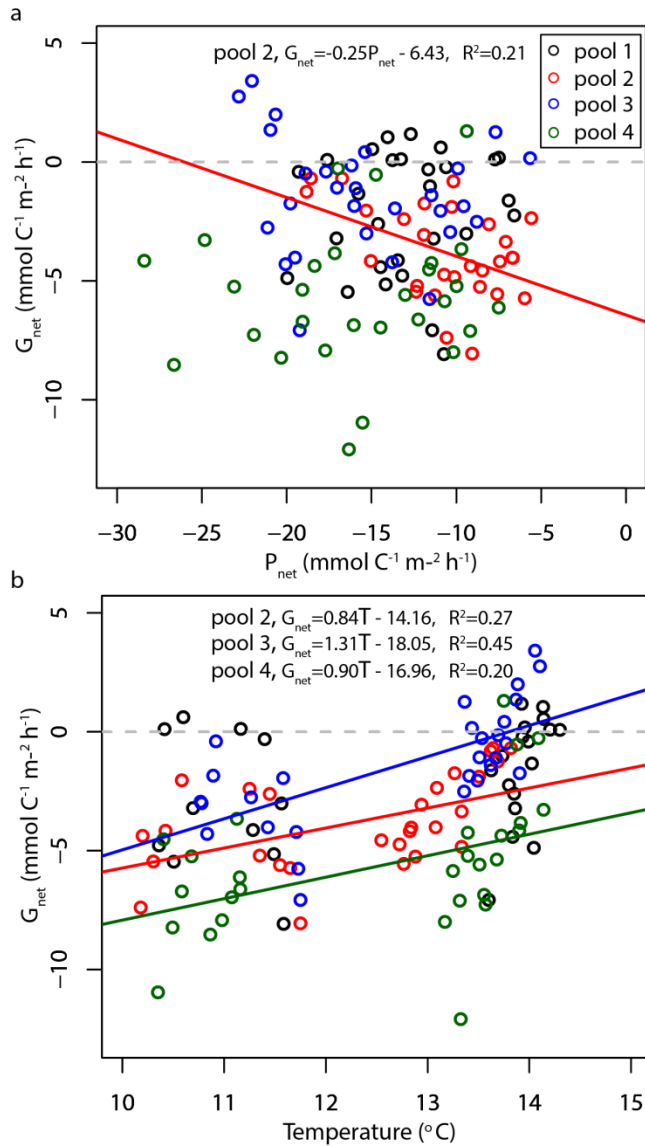

Figure S6. Nighttime  $G_{\text{net}}$  ( $\text{mmol C}^{-1} \text{m}^{-2} \text{h}^{-1}$ ) against a,  $P_{\text{net}}$  ( $\text{mmol C}^{-1} \text{m}^{-2} \text{h}^{-1}$ ), and b, Temperature ( $^{\circ}\text{C}$ ) in each of the tide pools. Regression lines of variables significant at the  $p < 0.05$  level are shown. Dashed grey lines show the separation between net community calcification and net community dissolution.

## References

1. Brewer, P. G. & Goldman, J. C. Alkalinity changes generated by phytoplankton growth1. *Limnol. Oceanogr.* **21**, 108–117 (1976).
2. Goldman, J. C. & Brewer, P. G. Effect of nitrogen source and growth rate on phytoplankton-mediated changes in alkalinity1. *Limnol. Oceanogr.* **25**, 352–357 (1980).
3. Wolf-Gladrow, D. A., Zeebe, R. E., Klaas, C., Körtzinger, A. & Dickson, A. G. Total alkalinity: The explicit conservative expression and its application to biogeochemical processes. *Mar. Chem.* **106**, 287–300 (2007).
4. Cleveland, W. S. & Loader, C. in *Statistical Theory and Computational Aspects of Smoothing* (eds Härdle, P. D. W. & Schimek, P. D. D. M. G.) 10–49 (Physica-Verlag HD, 1996). at [http://link.springer.com/chapter/10.1007/978-3-642-48425-4\\_2](http://link.springer.com/chapter/10.1007/978-3-642-48425-4_2)
